# Supplementary material for: Molecular mechanisms of cardioprotective effects mediated by transplanted cardiac ckit+ cells through the activation of an inflammatory hypoxia-dependent reparative response
Source: PubMed Central journal article supplement (PMC5787525; doi:10.18632/oncotarget.22946), 2017-12-06
Supplement: oncotarget-09-937-s001.pdf [file oncotarget-09-937-s001.pdf]

# Molecular mechanisms of cardioprotective effects mediated by transplanted cardiac ckit<sup>+</sup> cells through the activation of an inflammatory hypoxia-dependent reparative response

## SUPPLEMENTARY MATERIALS

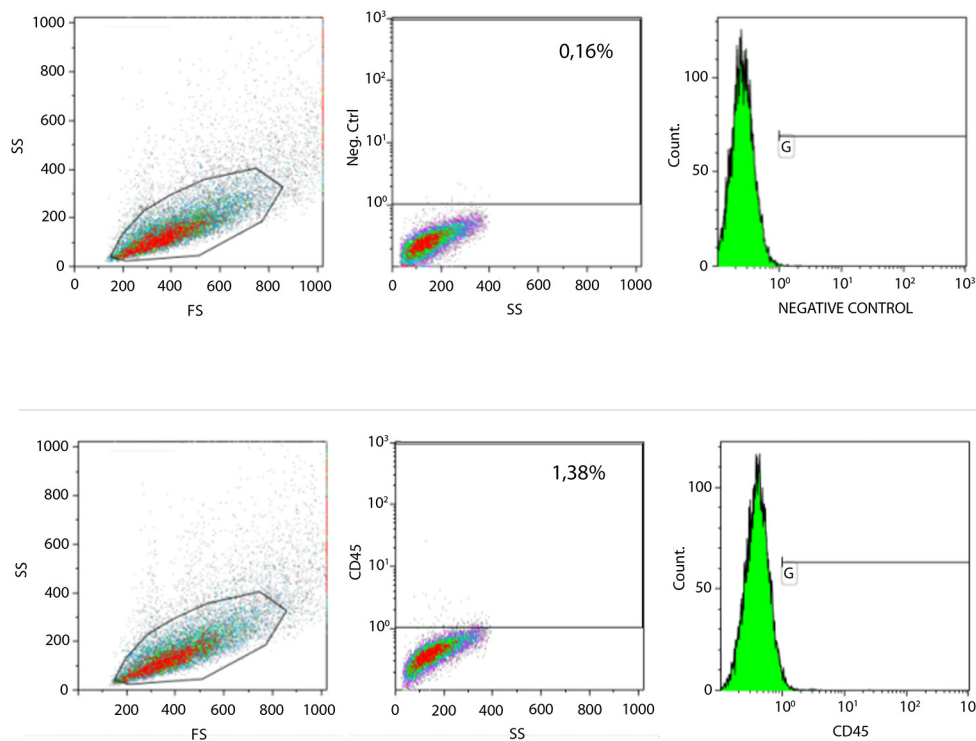

**Supplementary Figure 1: ckit<sup>+</sup>CSCs do not express the hematopoietic marker CD45.** Scatterplots of ckit<sup>+</sup>CSCs; the stem cell antigen ckit is expressed together with CD45. Negative isotype control is also shown.

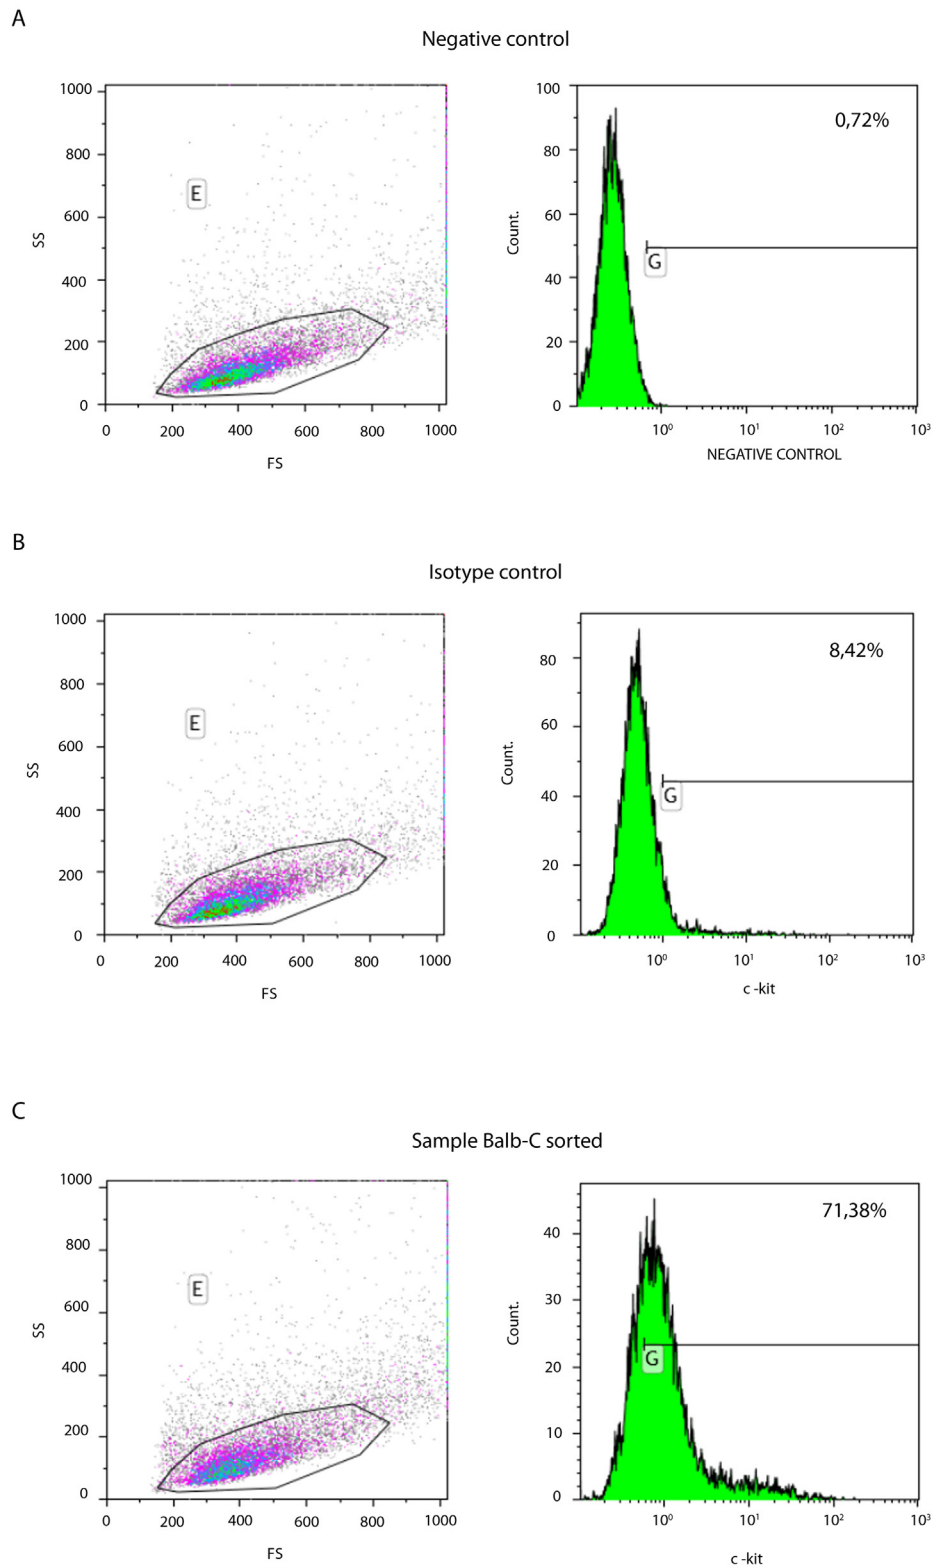

**Supplementary Figure 2: Characterization and growth properties of CSCs.** Distribution of c-kit expression in Isotype (A) and Negative control (B) preparation. c-kit expression (C) in sorted balb-c cells.

**Supplementary Table 1: Primer sequences for real time RT-PCR.**

**See Supplementary File 1**
